# Supplementary material
Source: PubMed Central journal article supplement (PMC5663276)

5/11/2016

## SUPPLEMENTARY MATERIAL

### Evidence for the Role of BAG3 in Mitochondrial Quality Control in Cardiomyocytes

Running Title:

Farzaneh G. Tahir<sup>1</sup>, Tijana Knezevic<sup>1</sup>, Manish K. Gupta<sup>1</sup>, Jennifer Gordon<sup>1</sup>,

Joseph Y. Cheung<sup>2,3</sup>, Arthur M. Feldman<sup>3,4</sup>, Kamel Khalili\*

1. Department of Neuroscience  
Center for Neurovirology  
Lewis Katz School of Medicine at Temple University  
Philadelphia, Pennsylvania

2. Center for Translational Medicine  
Lewis Katz School of Medicine at Temple University  
Philadelphia, Pennsylvania

3. Department of Medicine  
Lewis Katz School of Medicine at Temple University  
Philadelphia, Pennsylvania

4. Cardiovascular Research Center  
Lewis Katz School of Medicine at Temple University  
Philadelphia, Pennsylvania

#### Keywords:

- BAG3
- Parkin
- Tom20
- mitophagy
- proteasome

Contract grant sponsor: P30MH092177 (Khalili)

Contract grant sponsor: R01HL123093 (Khalili, Cheung, Feldman)

\*Corresponding author

Address: Department of Neuroscience, Lewis Katz School of Medicine at Temple University, 3500 N. Broad Street, Philadelphia, PA 19140 USA  
Telephone: 215.707.4500; Fax: 215.707.4888  
Email: kamel.khalili@temple.edu

## FIGURE LEGENDS

**Figure S1. Protein level normalized to Actin level after proteasome inhibition.** NRVCs were treated with MG132 (5  $\mu$ M, 12hr) in the presence or absence of CCCP (20  $\mu$ M, 12 hr). Protein levels of **(A)** BAG3, **(B)** Parkin, **(C)** VCP, **(D)** Beclin 1, **(E)** HSP70, **(F)** P62 and **(G)** LC3 II are normalized to Actin levels.

**Figure S2. BAG3 increases exogenous Parkin expression.** H9c2 cells were transfected with fluorescent Parkin plasmid with or without BAG3 siRNA and fluorescent signals were detected using flow cytometry in **(A)** Parkin overexpression **(B)** Parkin overexpression and CCCP treatment, **(C)** Parkin overexpression and BAG3 knockdown, and **(D)** Parkin overexpression, BAG3 knockdown and CCCP treatment conditions.

**Figure S1****A**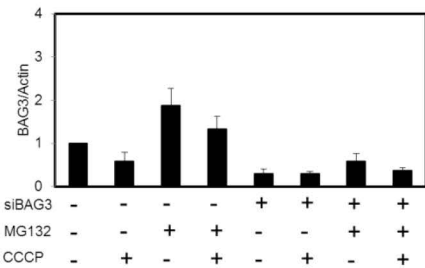**B**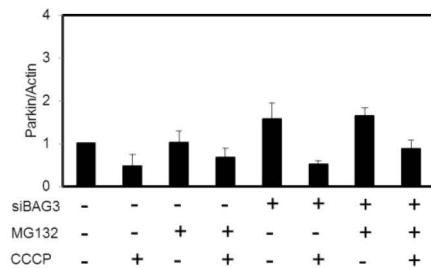**C**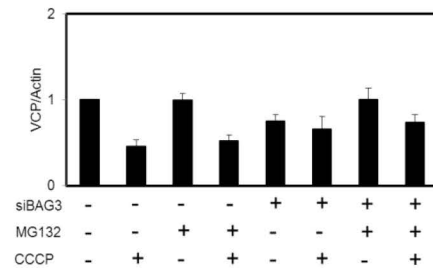**D**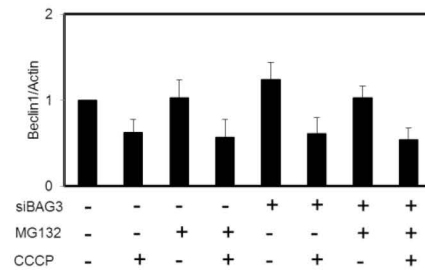**E**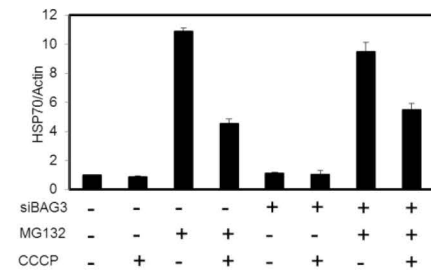**F**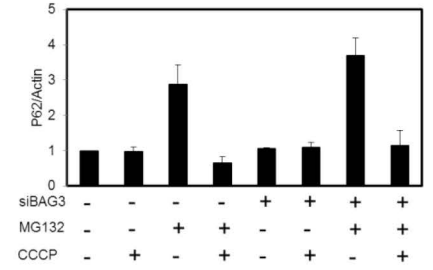**G**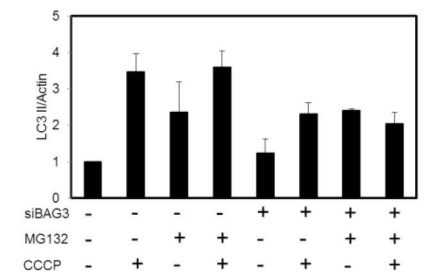

Figure S2

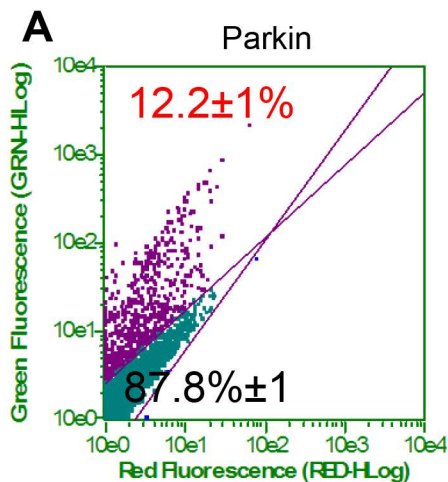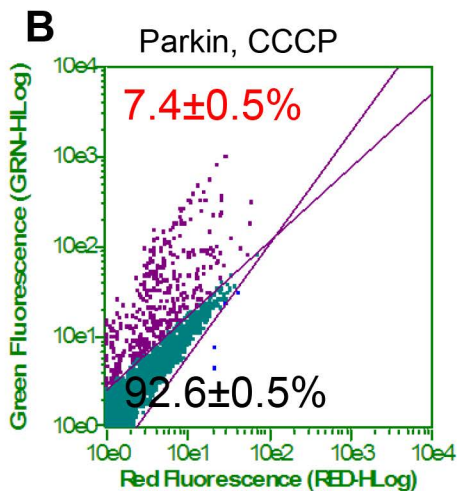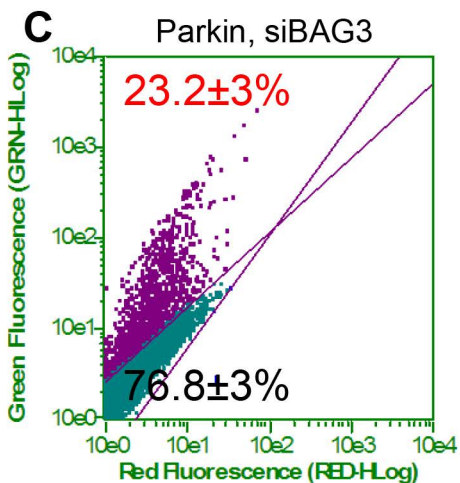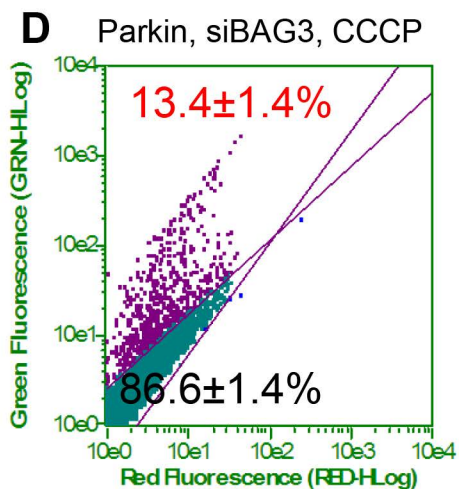

Supplement: NIHMS870347-supplement-supplement_1.pdf [file NIHMS870347-supplement-supplement_1.pdf]
